# Supplementary material for: Lenguajes en diálogo: entre la palabra y la imagen = Languages in dialogue: between the word and the image
Source: Royal Society of Chemistry journal article supplement (doi:10.1039/c9sc00738e), 2006-01-01
Supplement: c9sc00738e1.pdf [file c9sc00738e1.pdf]

## Supplementary Information for

### Quantifying rival bond fission probabilities following photoexcitation:

#### C–S bond fission in *t*-butylmethylsulfide:

Matthew Bain,<sup>1</sup> Christopher S. Hansen,<sup>2</sup> Tolga N.V. Karsili<sup>3</sup> and

Michael N.R. Ashfold<sup>1</sup>

<sup>1</sup> School of Chemistry, University of Bristol, Bristol, U.K., BS8 1TS

<sup>2</sup> School of Chemistry, University of New South Wales, Sydney, NSW 2052, Australia

<sup>3</sup> Department of Chemistry, University of Louisiana at Lafayette, Louisiana, LA 70504,  
U.S.A.

Corresponding authors:

[mike.ashfold@bristol.ac.uk](mailto:mike.ashfold@bristol.ac.uk)

[christopher.hansen@unsw.edu.au](mailto:christopher.hansen@unsw.edu.au)

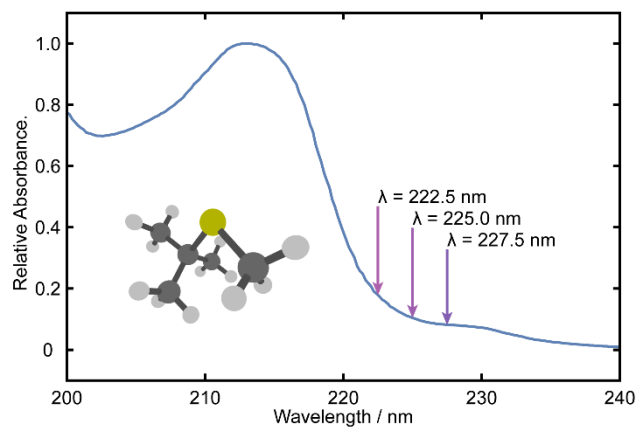

**Figure S1.** Absorption spectrum of the vapour above a room temperature dilute solution of BSM in *n*-hexane recorded against a background of pure *n*-hexane vapour, with the three photolysis wavelengths investigated in this study indicated by coloured arrows.

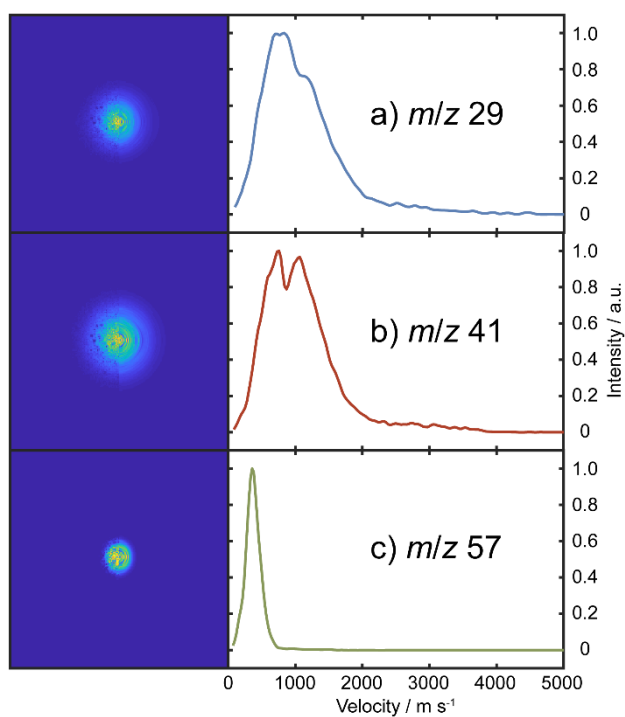

**Figure S2.** Images and associated velocity distributions of the  $m/z$  29, 41 and 57 fragments formed by pump only excitation at  $\lambda = 225.0$  nm.

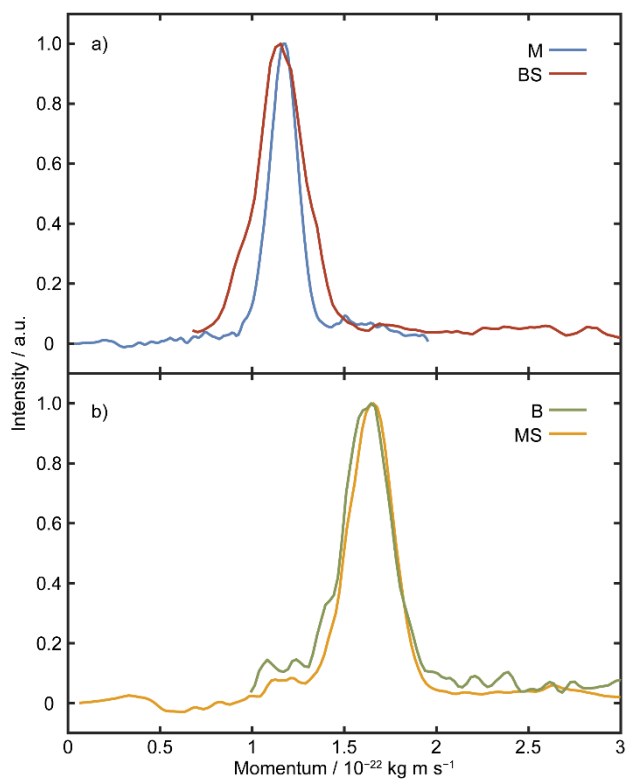

**Figure S3.** Normalized momentum distributions of the (a) M and BS and (b) B and MS fragments derived from images recorded following  $\lambda = 225.0$  nm photodissociation of BSM and subsequent SPI at  $\lambda = 118.2$  nm.

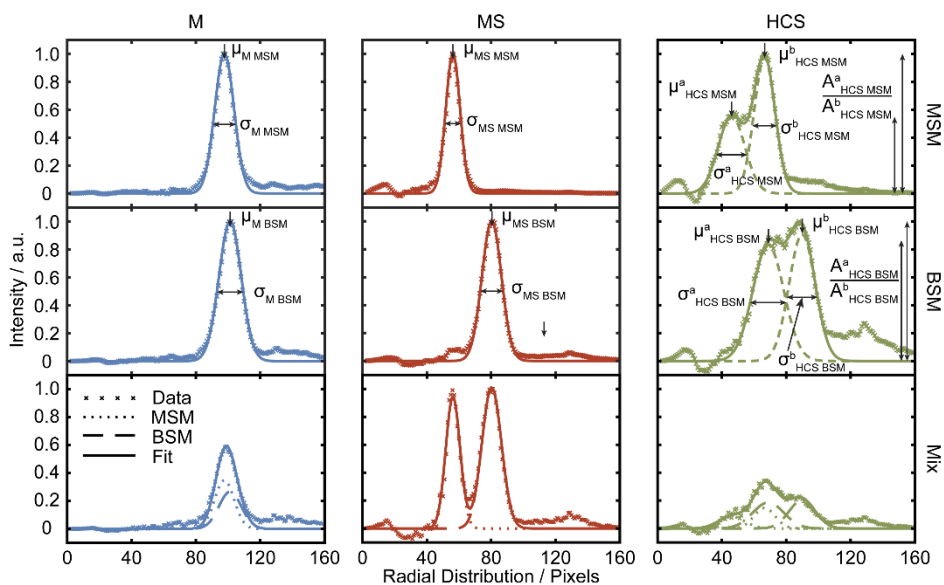

**Figure S4.** Radial distributions derived by integrating over the  $m/z$  15 ( $M^+$ , left hand column), 47 ( $MS^+$ , middle column) and 45 ( $HCS^+$ , right hand column) ion signals following  $\lambda = 225.0$  nm photolysis of MSM (top row), and BSM (middle row) and subsequent SPI at  $\lambda = 118.2$  nm, along with the best-fit Gaussians that are used as the basis functions when fitting the corresponding distributions from BSM/MSM mixtures. The bottom row shows the fits to these distributions for the BSM/MSM mixture featured in Figure 4 of the main paper.

| <b>Species</b>                                                                                | <b><math>\Delta_f H</math> (0 K)/ eV</b> | <b>Source</b>                    |
|-----------------------------------------------------------------------------------------------|------------------------------------------|----------------------------------|
| BSM                                                                                           | $-1.257 \pm 0.008$                       | Table 1                          |
| BS                                                                                            | $0.44 \pm 0.08$                          | Table 1                          |
| B                                                                                             | $0.782 \pm 0.007$                        | Table 1                          |
| BSM <sup>+</sup>                                                                              | $\sim 7.15$                              | From Table 1                     |
| B <sup>+</sup>                                                                                | $7.36 \pm 0.02$                          | From Table 1                     |
| MS                                                                                            | $1.346 \pm 0.018$                        | Table 1                          |
| C <sub>3</sub> H <sub>7</sub> <sup>+</sup>                                                    | $8.528 \pm 0.003$                        | ATcT, ref. 46 of paper           |
| C <sub>3</sub> H <sub>5</sub> <sup>+</sup>                                                    | $9.992 \pm 0.003$                        | ATcT, ref. 46 of paper           |
| C <sub>2</sub> H <sub>5</sub> <sup>+</sup>                                                    | $9.484 \pm 0.006$                        | ATcT, ref. 46 of paper           |
| C <sub>2</sub> H <sub>5</sub> S (ES)                                                          | $1.09 \pm 0.08$                          | Griller et al., ref. 44 of paper |
| C <sub>3</sub> H <sub>7</sub> S (PS)                                                          | $0.78 \pm 0.08$                          | Griller et al., ref. 44 of paper |
| C <sub>2</sub> H <sub>4</sub>                                                                 | $0.632 \pm 0.001$                        | ATcT, ref. 46 of paper           |
| CH <sub>4</sub>                                                                               | $-0.690 \pm 0.001$                       | ATcT, ref. 46 of paper           |
| <b>Threshold energies (0 K)</b>                                                               |                                          | <b>/ eV</b>                      |
| BSM $\rightarrow$ MS + B <sup>+</sup>                                                         |                                          | 9.965                            |
| $\rightarrow$ ES + C <sub>3</sub> H <sub>7</sub> <sup>+</sup>                                 |                                          | 10.88                            |
| $\rightarrow$ PS + C <sub>2</sub> H <sub>5</sub> <sup>+</sup>                                 |                                          | 11.52                            |
| $\rightarrow$ MS + C <sub>3</sub> H <sub>5</sub> <sup>+</sup> + CH <sub>4</sub>               |                                          | 11.905                           |
| $\rightarrow$ ES + C <sub>3</sub> H <sub>5</sub> <sup>+</sup> + H <sub>2</sub>                |                                          | 12.33                            |
| $\rightarrow$ MS + C <sub>2</sub> H <sub>5</sub> <sup>+</sup> + C <sub>2</sub> H <sub>4</sub> |                                          | 12.72                            |
| BSM <sup>+</sup> $\rightarrow$ MS + B <sup>+</sup>                                            |                                          | $\sim 1.55$                      |
| $\rightarrow$ ES + C <sub>3</sub> H <sub>7</sub> <sup>+</sup>                                 |                                          | $\sim 2.47$                      |
| $\rightarrow$ MS + C <sub>3</sub> H <sub>5</sub> <sup>+</sup> + CH <sub>4</sub>               |                                          | $\sim 3.50$                      |
| $\rightarrow$ ES + C <sub>3</sub> H <sub>5</sub> <sup>+</sup> + H <sub>2</sub>                |                                          | $\sim 3.95$                      |
| $\rightarrow$ MS + C <sub>2</sub> H <sub>5</sub> <sup>+</sup> + C <sub>2</sub> H <sub>4</sub> |                                          | $\sim 4.25$                      |
| $\rightarrow$ PS + C <sub>2</sub> H <sub>5</sub> <sup>+</sup>                                 |                                          | $\sim 4.40$                      |

**Table S1.** Enthalpies of formation of selected species (from Table 1 of main paper or the source indicated) used in estimating thermochemical threshold energies for dissociative ionization of BSM and for the photodissociation of BSM<sup>+</sup> cations. Fragment species detected

in the photolysis-laser-only ion TOF-MS are highlighted in bold. For reference, the energies of one and two  $\lambda = 225$  nm photolysis photons are, respectively, 5.51 and 11.02 eV.

|                  |                                 | MSM   |      |       |      |       |      |
|------------------|---------------------------------|-------|------|-------|------|-------|------|
|                  | $\lambda$ / nm                  | 227.5 |      | 225.0 |      | 222.5 |      |
| M <sup>+</sup>   | $\mu$ / pixels                  | 97.3  |      | 97.7  |      | 97.9  |      |
|                  | $\sigma$ / pixels               | 5.3   |      | 6.0   |      | 5.9   |      |
| MS <sup>+</sup>  | $\mu$ / pixels                  | 55.9  |      | 56.2  |      | 56.2  |      |
|                  | $\sigma$ / pixels               | 3.6   |      | 4.5   |      | 4.2   |      |
| HCS <sup>+</sup> | $\mu^a, \mu^b$ / pixels         | 45.2  | 65.6 | 46.0  | 66.5 | 47.0  | 67.4 |
|                  | $\sigma^a, \sigma^b$ / pixels   | 7.7   | 6.5  | 8.3   | 6.5  | 10.2  | 6.5  |
|                  | A <sup>a</sup> , A <sup>b</sup> | 0.56  | 1    | 0.57  | 1    | 0.72  | 1    |

**Table S2.** Best-fit parameters for the Gaussian functions used to describe the M<sup>+</sup>, MS<sup>+</sup> and HCS<sup>+</sup> velocity distributions following photolysis of MSM at  $\lambda = 227.5, 225.0$  and  $222.5$  nm with, in each case, subsequent SPI at  $\lambda = 118.2$  nm.



|                  |                                 | BSM   |      |       |      |       |      |
|------------------|---------------------------------|-------|------|-------|------|-------|------|
|                  | $\lambda$ / nm                  | 227.5 |      | 225.0 |      | 222.5 |      |
| M <sup>+</sup>   | $\mu$ / pixels                  | 101.2 |      | 101.3 |      | 101.3 |      |
|                  | $\sigma$ / pixels               | 6.4   |      | 6.9   |      | 8.1   |      |
| MS <sup>+</sup>  | $\mu$ / pixels                  | 80.9  |      | 80.3  |      | 79.3  |      |
|                  | $\sigma$ / pixels               | 6.0   |      | 6.1   |      | 6.4   |      |
| HCS <sup>+</sup> | $\mu^a, \mu^b$ / pixels         | 68.7  | 90.2 | 68.8  | 89.9 | 67.8  | 89.3 |
|                  | $\sigma^a, \sigma^b$ / pixels   | 10.6  | 8.5  | 9.7   | 8.1  | 9.8   | 8.3  |
|                  | A <sup>a</sup> , A <sup>b</sup> | 0.95  | 1    | 0.92  | 1    | 0.94  | 1    |

**Table S3.** Best-fit parameters for the Gaussian functions used to describe the M<sup>+</sup>, MS<sup>+</sup> and HCS<sup>+</sup> velocity distributions following photolysis of BSM at  $\lambda = 227.5, 225.0$  and  $222.5$  nm with, in each case, subsequent SPI at  $\lambda = 118.2$  nm.

| Species | Vibrational wavenumbers / $\text{cm}^{-1}$                                                                                                                                                                                                                                 | zpe / eV |
|---------|----------------------------------------------------------------------------------------------------------------------------------------------------------------------------------------------------------------------------------------------------------------------------|----------|
| M       | 3282, 3282, 3103, 1403, 1403, 505                                                                                                                                                                                                                                          | 0.80     |
| MS      | 3106, 3082, 3011, 1472, 1370, 1338, 866, 703, 589                                                                                                                                                                                                                          | 0.95     |
| B       | 3074, 3074, 3069, 3030, 3027, 3027, 2923, 2914, 2914, 1493, 1492, 1489, 1471, 1471, 1469, 1423, 1396, 1396, 1292, 1292, 1093, 1006, 1006, 970, 936, 936, 756, 380, 379, 259, 133, 132, 132                                                                                 | 3.12     |
| BS      | 3110, 3108, 3104, 3087, 3083, 3079, 3022, 3016, 3014, 1515, 1498, 1489, 1487, 1483, 1472, 1428, 1399, 1394, 1213, 1207, 1189, 1019, 992, 970, 934, 921, 792, 576, 385, 370, 363, 289, 274, 259, 234, 222                                                                   | 3.25     |
| BSM     | 3122, 3117, 3106, 3104, 3099, 3088, 3081, 3077, 3038, 3026, 3019, 3015, 1518, 1504, 1503, 1491, 1489, 1483, 1479, 1467, 1430, 1401, 1401, 1355, 1240, 1236, 1193, 1049, 1040, 972, 971, 967, 938, 931, 806, 707, 570, 418, 401, 361, 315, 300, 271, 266, 225, 214, 175, 62 | 4.30     |

**Table S4.** Harmonic wavenumbers for the fundamental vibrational modes of the ground states of M, MS, B, BS and BSM used in establishing the zero-point corrections to the absolute and relative dissociation energies reported in Table 1 and the zero-point energies associated with the disappearing modes in the bond fissions shown in Figure 5.
